# Supplementary material for: The tumor-associated YB-1 protein: new player in the circadian control of cell proliferation
Source: PubMed Central journal article supplement (PMC5351623; doi:10.18632/oncotarget.14051), 2016-12-20
Supplement: oncotarget-08-6193-s001.pdf [file oncotarget-08-6193-s001.pdf]

## The tumor-associated YB-1 protein: new player in the circadian control of cell proliferation

### Supplementary Materials

Supplementary Table S1: Statistical analysis

| name                                             | Figure | pAnova<br>Circ-wave | T-Test/Anova/Bonferroni               |
|--------------------------------------------------|--------|---------------------|---------------------------------------|
| Fin-YB-1 N-ter nuclear LD (IMF)                  | 1A,B   | -                   | $P < 0.0001$ (T-Test Microsoft Excel) |
| Fin-YB-1 N-ter nuclear LD first day (WB)         | 2A     | $P = 0.0001$        | $P < 0.0001$                          |
| Fin-YB-1 N-ter nuclear LD second day WB          | 2A     | $P = 0.0277$        | $P < 0.001$                           |
| Fin-YB-1 Full nuclear LD first day (WB)          | 2B     | $P < 0.00001$       | $P < 0.0001$                          |
| Fin-YB-1 Full nuclear LD second day (WB)         | 2B     | $P = 0.0005$        | $P < 0.001$                           |
| Fin-YB-1 N-ter nuclear DD (WB)                   | 2C     | $P < 0.00001$       | $P < 0.001$                           |
| PAC-2 cells YB-1 N-ter LD (IMF)                  | 3A     | $P < 0.00001$       | $P < 0.0001$                          |
| PAC-2 cells YB-1 N-ter nuclear LD (WB)           | 3B     | $P < 0.00001$       | $P < 0.001$                           |
| CLOCK1 DN cells YB-1 N-ter LD (IMF)              | 3C     | ns $P = 0.061$      | ns $P > 0.05$                         |
| CLOCK1 DN cells YB-1 N-ter LD (WB)               | 3D     | ns $P = 0.0617$     | ns $P > 0.05$                         |
| <i>h per2</i> DEX in HEK 293 cells (qRT-PCR)     | 4A     | $P = 0.03822$       |                                       |
| <i>h bmal1</i> DEX in HEK 293 cells (qRT-PCR)    | 4B     | $P = 0.04847$       |                                       |
| <i>H YB-1</i> DEX in HEK 293 cells (WB)          | 4D     | $P = 0.02372$       |                                       |
| <i>Ubc9b (ube2ib)</i> LD (qRT-PCR)               | 5C     | $P = 0.0004$        |                                       |
| <i>Ubc9b (ube2ib)</i> DD (qRT-PCR)               | 5C     | $P = 0.0282$        |                                       |
| PAC-2 cells <i>zf cyclinA2 pr.-Luc LD</i>        | 6A     | -                   | $P = 0.004$ (T-Test MATLAB)           |
| CLOCK1 DN cells <i>zf cyclinA2 pr.-Luc LD</i>    | 6A     | -                   | ns $P = 0.6$ (T-Test MATLAB)          |
| Fin-YB-1 F. nuclear DD (WB)                      | S2D    | $P < 0.0001$        | $P < 0.05$                            |
| <i>zf Yb1 LD</i> (qRT-PCR)                       | S4A    | ns $P = 0.8052$     | ns $P > 0.05$                         |
| <i>zf Yb1 DD</i> (qRT-PCR)                       | S4A    | ns $P = 0.066$      | $P < 0.004$ ct 0 vs ct 21             |
| <i>zf Per1b LD</i> (qRT-PCR)                     | S4B    | $P < 0.00001$       | $P < 0.0001$                          |
| <i>zf Per1b DD</i> (qRT-PCR)                     | S4B    | $P < 0.00001$       | $P < 0.0001$                          |
| <i>zf cyclinA2 LD</i> (qRT-PCR)                  | S4C    | $P < 0.00001$       | $P < 0.001$                           |
| <i>zf cyclinA2 DD</i> (qRT-PCR)                  | S4C    | $P < 0.0001$        | $P < 0.001$                           |
| PAC-2 cells YB-1 N-ter nuclear DD, no serum (WB) | S5F    | $P = 0.015$         | $P < 0.05$                            |
| <i>zf ubc9a (ube2ia) LD</i> (qRT-PCR)            | S6A    | $P < 0.00001$       |                                       |
| <i>zf ubc9a (ube2ia) DD</i> (qRT-PCR)            | S6A    | $P < 0.00001$       |                                       |
| <i>zf sumo1 LD</i> (qRT-PCR)                     | S6B    | $P = 0.0002$        |                                       |
| <i>zf sumo1 DD</i> (qRT-PCR)                     | S6B    | $P = 0.0033$        |                                       |
| <i>zf pias LD</i> (qRT-PCR)                      | S6C    | $P < 0.00001$       |                                       |
| <i>zf pias DD</i> (qRT-PCR)                      | S6C    | ns $P = 0.2$        |                                       |
| <i>zf sae1 LD</i> (qRT-PCR)                      | S6D    | $P = 0.0016$        |                                       |
| <i>zf sae1 DD</i> (qRT-PCR)                      | S6D    | $P = 0.008$         |                                       |
| <i>zf cyclinA2 LD</i> cells (qRT-PCR)            | S7B    | $P < 0.00001$       | $P < 0.001$                           |

**Supplementary Table S2: PCR primers for qRT-PCR and ChIP assays**

|                                  |                              |                            |
|----------------------------------|------------------------------|----------------------------|
| <i>zf β-actin</i>                | F: GCCTGACGGACAGGTCAT        | R: ACCGCAAGATTCCATACCC     |
| <i>zf Yb-1</i>                   | F: TACCCACCATACTTCGTGCG      | R: GCGGTAGTTGAAGTTGCGAC    |
| <i>zf per1b</i>                  | F: CCGTCAGTTTCGCTTTTCTC      | R: ATGTGCAGGCTGTAGATCCC    |
| <i>zf cyclin A2 (ccna2)</i>      | F: TAGATTGCGATCCCTTCCTC      | R: CCTGTTGAGCGTGTGAGAA     |
| <i>Zf ubc9b (ube2ib)</i>         | F: CAGGATCCAGCTCAGGCAGA      | R: CGACGGGGAGAACTTTTTGG    |
| <i>Zf ubc9a (ube2ib)</i>         | F: AGGCCGAGGCATACACGATT      | R: GTGGTGGACGGGGTGGAGAG    |
| <i>zf sae1</i>                   | F: GCCAAAGATCGACCCCAATG      | R: TCGCCTTCAGGCTGCTTTTA    |
| <i>zf PIAS1</i>                  | F: TCCGTCAGTGTCCAGCCTCT      | R: ACCTGAGGCATGCTGGGAGT    |
| <i>zf sumo1</i>                  | F: AGAGACAGGGTGTACCCGTGAA    | R: TGGGGGTCAGGTTGTCTGTG    |
| <i>zf cyclin A2 prom. 150 bp</i> | F: AACCCGCCACCACAAGTTTATT    | R: GGCAACGTCATCAGGGGTAGA   |
| <i>zf cyclin A2 prom. 450 bp</i> | F: AACCCGCCACCACAAGTTTATT    | R: GCACGCTAACAGAGAAAGC     |
| <i>h - gapdh</i>                 | F: ACGTGTCACTGGTGGACCTGA     | R: AGCGTCAAAGGTGGAGGAGTG   |
| <i>h per2</i>                    | F: CCACGAGAATGAAATCCGCT      | R: CCCGCACCTTGACCAGG       |
| <i>h bmall</i>                   | F: GAAATCATGGAAATCCACAGGATAA | R: GAGGCGTACTCGTGATGTTCAAT |

**Supplementary Table S3: siRNAs**

|                                |                                        |                                            |
|--------------------------------|----------------------------------------|--------------------------------------------|
| iBONI zfYB-1 siRNA             | 5'-3' Guide<br>UUCUCCUUAUCCUCCUCUCCCC  | 5'-3 Passenger<br>GGGGGAGAGGAGGAUAAGGAGAA  |
| iBONi siRNA Negative Control 1 | 5'-3' Guide<br>UUGUACUACACAAAAGUACCCCC | 5'-3 Passenger<br>GGGGGUACUUUUGUGUAGUACAA  |
| iBONi siRNA Negative Control 2 | 5'-3' Guide<br>GAACGAAUUUAUAAGUGGCCCC  | 5'-3 Passenger<br>GGGGGCCACUUUAUAAAUUCGUUC |
| iBONi siRNA Negative Control 3 | 5'-3' Guide<br>UUGUACUACACAAAAGUACCCCC | 5'-3 Passenger<br>GGGGGUACUUUUGUGUAGUACAA  |

**Supplementary Table S4: Primary and secondary antibodies**

|                                              |                                            |
|----------------------------------------------|--------------------------------------------|
| Abcam ab12148 α-YB-1                         | Residues 1-100 of human YBX-1 (N-ter)      |
| Santa Cruz sc-101198 α-YB-1 (59 Q)           | Against recombinant full α-human YBX-1 (F) |
| Sigma-Aldrich α-YB-1 (C-ter) Y0396           | Residues 307-324 of human α-YBX-1 (C-ter)  |
| Santa Cruz Sc- 5308 α-SUMO-1 (D-11)          | Residues 1-101 of human-SUMO1              |
| Sigma-Aldrich V9131 α-vinculin               | α-vinculin monoclonal clone hVIN-1         |
| Cell Signaling α-H3 (9715S)                  | α-H3                                       |
| Cell Signaling α-PH3 (9701S)                 | α-PH3                                      |
| Rabbit Polyclonal, Goat, HRP                 | Cell Signaling (7074S)                     |
| α-Mouse Monoclonal,Goat,HRP (7076S)          | Cell Signaling (7076S)                     |
| α-Mouse Alexa fluor 546 F(ab') <sub>2</sub>  | Life Technologies (A11018)                 |
| α-Rabbit Alexa fluor 546 F(ab') <sub>2</sub> | Life Technologies (A11017)                 |

**Supplementary Table S5: Cloning details**

| Name                      | Vector                                        | Insert | Details                                                                                                         |
|---------------------------|-----------------------------------------------|--------|-----------------------------------------------------------------------------------------------------------------|
| zf YB-1 cDNA              | pGEM-T easy (Promega)                         | PCR    | primer in 5' UTR F: gtggagagatgtgacagaatcgc<br>primer in 3' UTR R: gttttatttcagcttgccctttg                      |
| zf YB-1-GFP(3')           | pcDNA6-V5/HisB GFP<br>Afl2 –EcoR1             | PCR    | primer F: ccggcttaagcaacaagaaacaacATG<br>primer R: gcggtTTGaattcgcctccgcctgttc<br>Stop codon TAA mutated to CAA |
| 5xMyc-zfYB-1              | pCS2 MTK 5xMyc<br>(Invitrogen)<br>EcoR1- Xho1 | PCR    | ATG mutated to TTC:<br>primer F: gaaaagaaTTCagcagcagaggccgagaca<br>primer R: ggatggtctcagaggttaagccgggtggcggg   |
| zf cyclin A2 prom.        | pGEM-T easy (Promega)                         | PCR    | primer F: ccgccaccacaagtttattc<br>primer R: gcacgctaaccagagaagc                                                 |
| zf cyclin A2-luc reporter | pGL3 basic<br>(Promega) Sac1-Nco1             |        | SacI-NcoI from<br>zf cyclin A2 prom. pGEM-T easy                                                                |

**YB-1 sequences alignment**

|            |     |                                                       |                                                |                                       |                                  |                  |     |
|------------|-----|-------------------------------------------------------|------------------------------------------------|---------------------------------------|----------------------------------|------------------|-----|
|            |     |                                                       |                                                | Cold-shock domain                     |                                  |                  |     |
| H.sapiens  | 1   | MSSEAE                                                | QPPA                                           | PPAALSAADTKPGTTGSGAGSGGPGGLTSAAPAGGDK | KVIATKVLGTVKWFNVRNGYGFINRNDTKEDV | FVHQTAIKKNNPRKYL | 100 |
| M.musculus | 1   | MSSEAE                                                | QPPA                                           | PPAALSAADTKPGTTGSGAGSGGPGGLTSAAPAGGDK | KVIATKVLGTVKWFNVRNGYGFINRNDTKEDV | FVHQTAIKKNNPRKYL | 98  |
| D.rerio    | 1   | MSSEAE                                                | QPPA                                           | PPAALSAADTKPGTTGSGAGSGGPGGLTSAAPAGGDK | KVIATKVLGTVKWFNVRNGYGFINRNDTKEDV | FVHQTAIKKNNPRKYL | 80  |
| <br>       |     |                                                       |                                                |                                       |                                  |                  |     |
| H.sapiens  | 101 | RSVGDGETVEFDVVEGEKGAEEAANVTG                          | GGVVPVQGSKYAADRNHYRRYPRRRGPPRNYQNYQNS          | ---ESG                                | EKNEGSESAPEGQ--AQRRPY--RRRRF     |                  | 193 |
| M.musculus | 99  | RSVGDGETVEFDVVEGEKGAEEAANVTG                          | GGVVPVQGSKYAADRNHYRRYPRRRGPPRNYQNYQNS          | ---ESG                                | EKNEGSESAPEGQ--AQRRPY--RRRRF     |                  | 191 |
| D.rerio    | 81  | RSVGDGETVEFDVVEGEKGAEEAANVTG                          | GGVVPVQGSKYAADRNHYRRYPRRRGPPRNYQNYQNS          | ---ESG                                | EKNEGSESAPEGQ--AQRRPY--RRRRF     |                  | 180 |
| <br>       |     |                                                       |                                                |                                       |                                  |                  |     |
| H.sapiens  | 194 | PPYYMRRPYGRRPQYSNPVQGEVMEGADNQGA                      | --G-EQG-RPVRQNMRYGRFRFRRGPPRQRQPREDGNEEDKENQGD | ETQQQP                                | PPRRYRRNFNRYRRR                  |                  | 290 |
| M.musculus | 192 | PPYYMRRPYARRPQYSNPVQGEVMEGADNQGA                      | --G-EQG-RPVRQNMRYGRFRFRRGPPRQRQPREDGNEEDKENQGD | ETQQQP                                | PPRRYRRNFNRYRRR                  |                  | 288 |
| D.rerio    | 181 | PPYFVRRRYGRRPPYTSNQ-RGEMTEGGEGEENQGGPDQGNKPMRQNYRGRFR | --SRGPPRPRPVR-DG-EEDKENQSESGNQEP               | RRYRRNFNRYRRR                         |                                  |                  | 276 |
| <br>       |     |                                                       |                                                |                                       |                                  |                  |     |
| H.sapiens  | 291 | RPENPKPQDGKETKAADPPAENS                               | SAPAEQGGAE                                     |                                       |                                  | 324              |     |
| M.musculus | 289 | RPENPKPQDGKETKAADPPAENS                               | SAPAEQGGAE                                     |                                       |                                  | 322              |     |
| D.rerio    | 277 | RPQTTPKPDGKDSKAADASADKSAPEAEQGGAD                     |                                                |                                       |                                  | 309              |     |

**Supplementary Figure S1: Human, mouse and zebrafish YB-1 protein alignment.** Multiple alignments of YB-1 protein sequences derived from *H. sapiens* (NP\_004550), *M. musculus* (NP\_035862) and zebrafish (*D. rerio* NP\_001119929.1). Asterisks (\*) indicate conserved amino acids (aa) between the three species. The Cold-Shock domain (CSD) is indicated in red. Black bordered squares indicate the three putative sumoylation sites predicted by GPS-SUMO 1.0 software. The sites are defined as consensus  $\psi$ KxE/D or inverted E/DxK $\psi$  where  $\psi$  = hydrophobic aa; x = any aa. In zfYB-1: DSKA 287-290 aa is a predicted canonical inverted sumoylation site. Instead, TKED 60-63 aa and EKRE 151-154 aa are scored as non-canonical sumoylation sites due to the absence of a  $\psi$  amino acid.

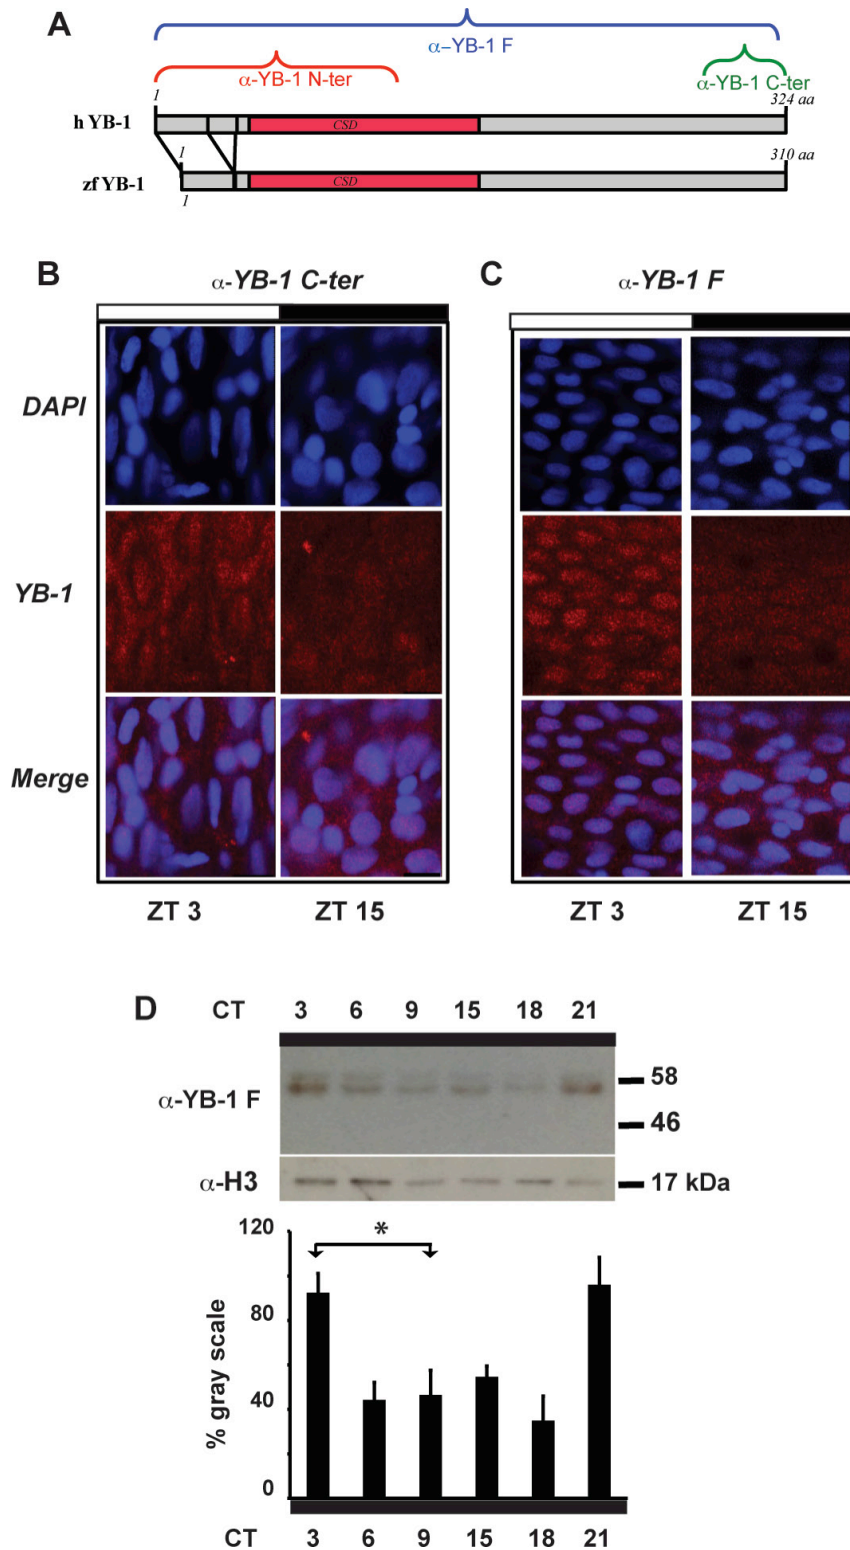

**Supplementary Figure S2: zfyB-1 protein expression in caudal fins.** (A) Schematic representation of the human and zebrafish YB-1 proteins. Cold Shock Domains (red bars, CSD) and the portions recognized by the 3 antibodies,  $\alpha$ -YB-1 N-ter, C-ter and F are indicated. (B, C) Immunofluorescence analysis of zfyB-1 protein in the caudal fin at ZT3 (light phase) and ZT15 (dark phase) using the  $\alpha$ -YB-1 C-ter (B) and  $\alpha$ -YB-1 F antibodies (C). Panel also shows DAPI staining and Merge, which combines both the DAPI and YB-1 signals. White and black bars above the panel indicate the corresponding lighting conditions. (D) Western blot analysis of zfyB-1 levels in fin nuclear extracts prepared during the second day in DD following transfer from LD cycle conditions.  $\alpha$ -H3 was used for normalization. Quantification of western blot signals in panel D, was expressed as % of gray scale relative to the highest peak time point and plotted on the y-axis. CT times for each sample are plotted on the x-axis. Statistical significance is indicated above the graph by asterisks (\*). White and black bars indicating the corresponding lighting conditions as well as the ZT (for LD) and CT (for DD) times are indicated above each panel.

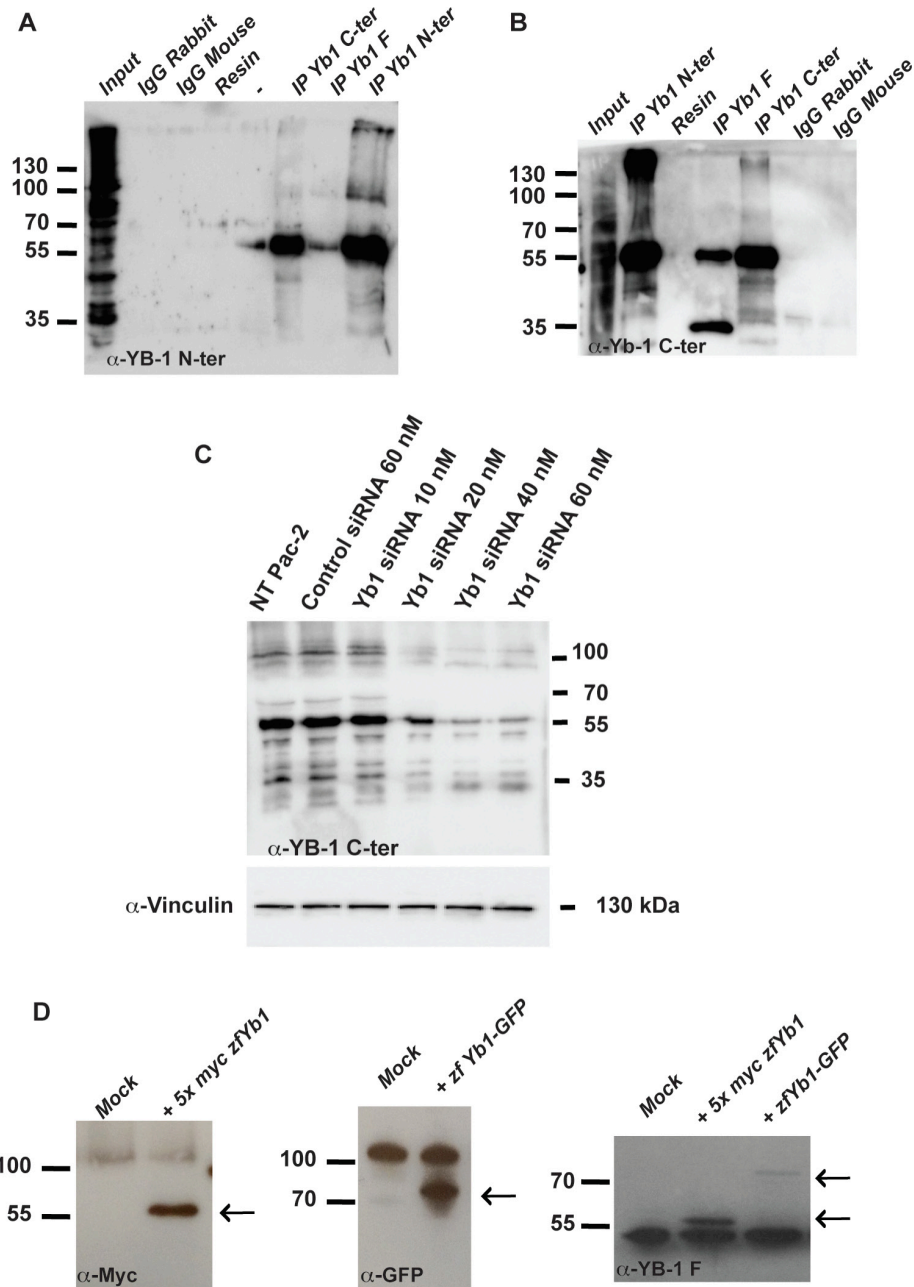

**Supplementary Figure S3: Immunoprecipitation (IP), silencing (siRNA) and overexpression of of zfYB-1.** (A) Western blot analysis using  $\alpha$ -YB1 N-ter and (B)  $\alpha$ -YB1 C-ter antibodies of IPs prepared from cell total extracts using each of the three YB-1 antibodies. (C) Western blot analysis using  $\alpha$ -YB1 C-ter of total cell extracts prepared from Pac-2 cells transfected with increasing concentrations of zfYB-1 siRNA and normalized using an  $\alpha$ -vinculin antibody. As a control, Pac-2 cells were transfected with a high dose (60 nM) of a pool of scrambled siRNAs (control). (D) Control western blot analysis using  $\alpha$ -Myc,  $\alpha$ -GFP and  $\alpha$ -YB-1 F antibodies of total cell extracts prepared from Pac-2 cells transfected with 5xMyc-zfYB-1 or zfYB-1-GFP expression constructs for zfYB-1.

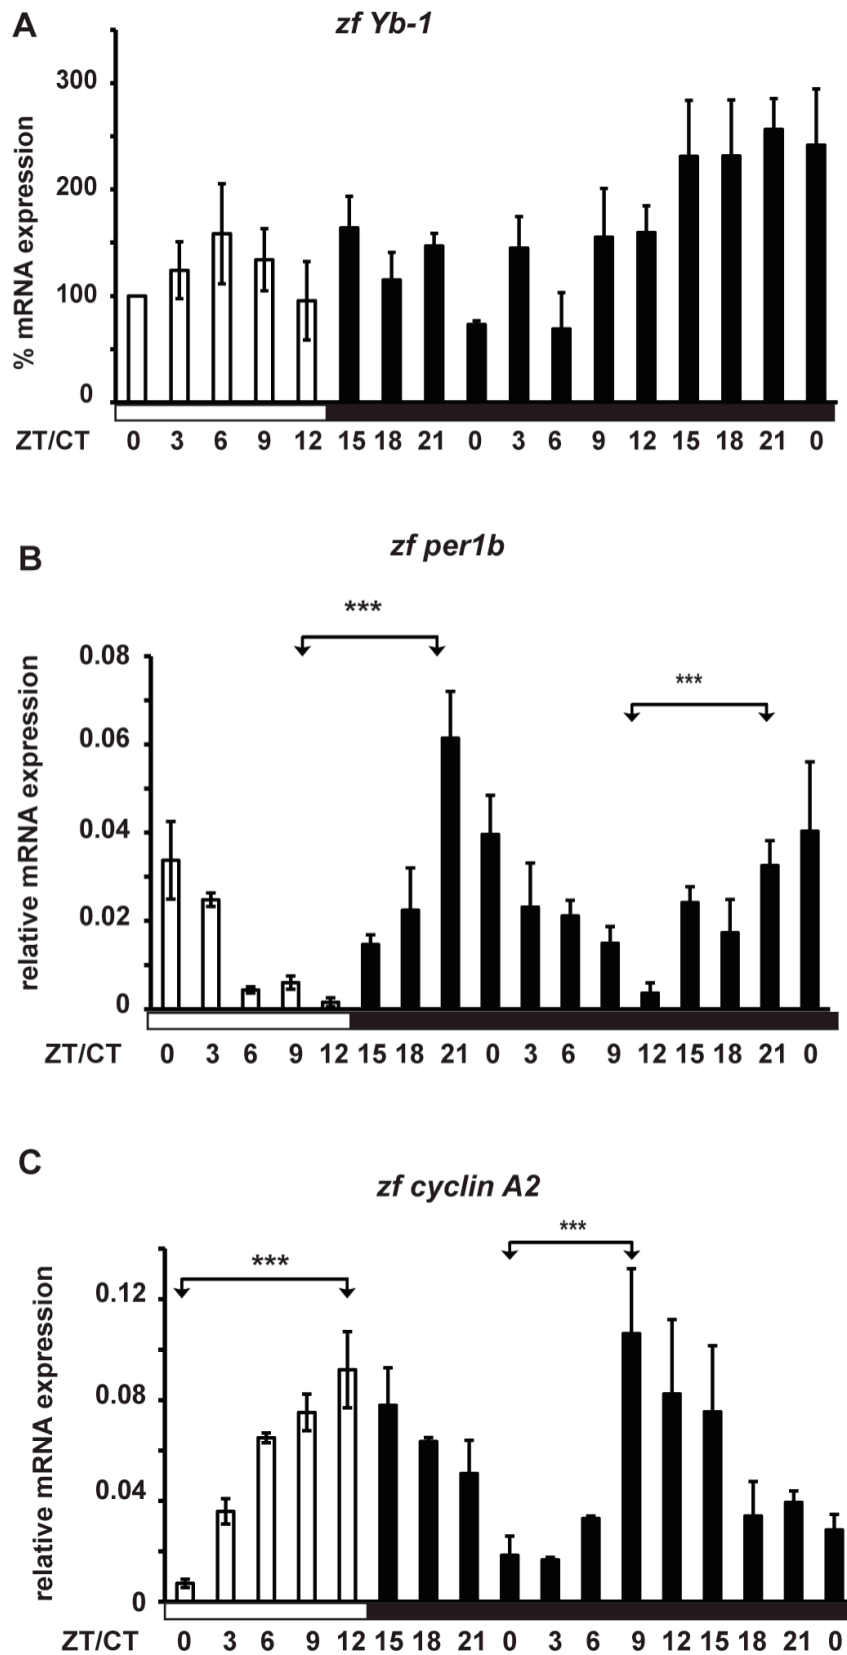

**Supplementary Figure S4: Real time qRT-PCR analysis of zebrafish caudal fin gene expression.** qRT-PCR analysis of *zfYB-1* (A) *zfper1b* (B) and *zfcyclin A2* expression (C) during exposure for 24 hours to LD cycle conditions followed by 24 hours in DD. RNA samples were harvested at 3 hrs intervals and relative mRNA levels calculated and plotted on the y-axis. ZT and CT times are plotted on the x-axis. Relative expression of  $\beta$ -actin mRNA was used for normalization. Statistical significance is indicated above the graph by asterisks (\*).

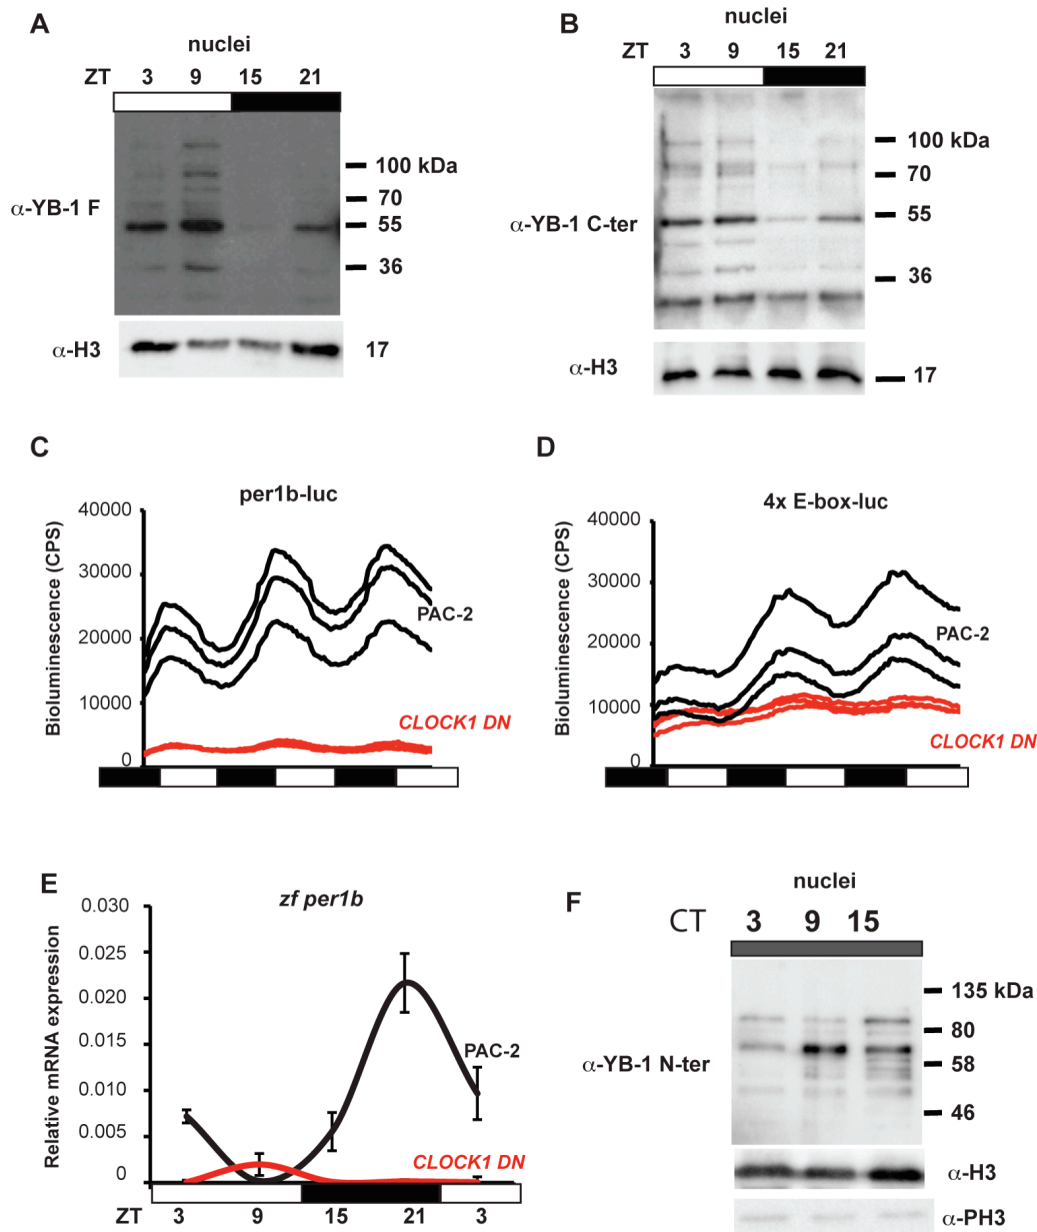

**Supplementary Figure S5: Nuclear YB-1 expression in PAC-2 and CLOCK1 DN cells.** (A, B) Western blot analysis of nuclear extracts from PAC-2 cells using (A) the  $\alpha$ -YB-1 F and (B)  $\alpha$ -YB-1 C-ter antibodies. Histone H3 was used for normalization. (C, D) Real time bioluminescence assay of PAC-2 (black traces) and CLOCK1 DN (red traces) cells under LD cycles transfected with (C) the *per1b-luc* and (D) the *4x E-box-luc* reporters. Three independent assays for each cell line are represented. Bioluminescence levels (counts per seconds, CPS) are plotted on the y-axis. White and black bars indicate the corresponding lighting conditions. (E) qRT-PCR analysis of *zf per1b* in PAC-2 (black traces) and CLOCK1 DN (red traces) cells exposed to a LD cycle. RNA samples were harvested at 6 hrs intervals for 30 hours and the calculated, relative mRNA levels are plotted on the y-axes. ZT times are plotted on the x-axes. Relative expression of  $\beta$ -actin mRNA was used for normalization. (F) Western blot analysis for YB-1 in nuclear extracts prepared from confluent PAC-2 cells maintained in LD followed by 48 hours in constant darkness in the absence of serum before sampling. The  $\alpha$ -YB-1 N-ter antibody was used. Histone H3 was used as an internal loading control and P-H3 was used as a control for lack of proliferation. White and black bars indicating the corresponding lighting conditions as well as the ZT or CT times are represented in each panel.

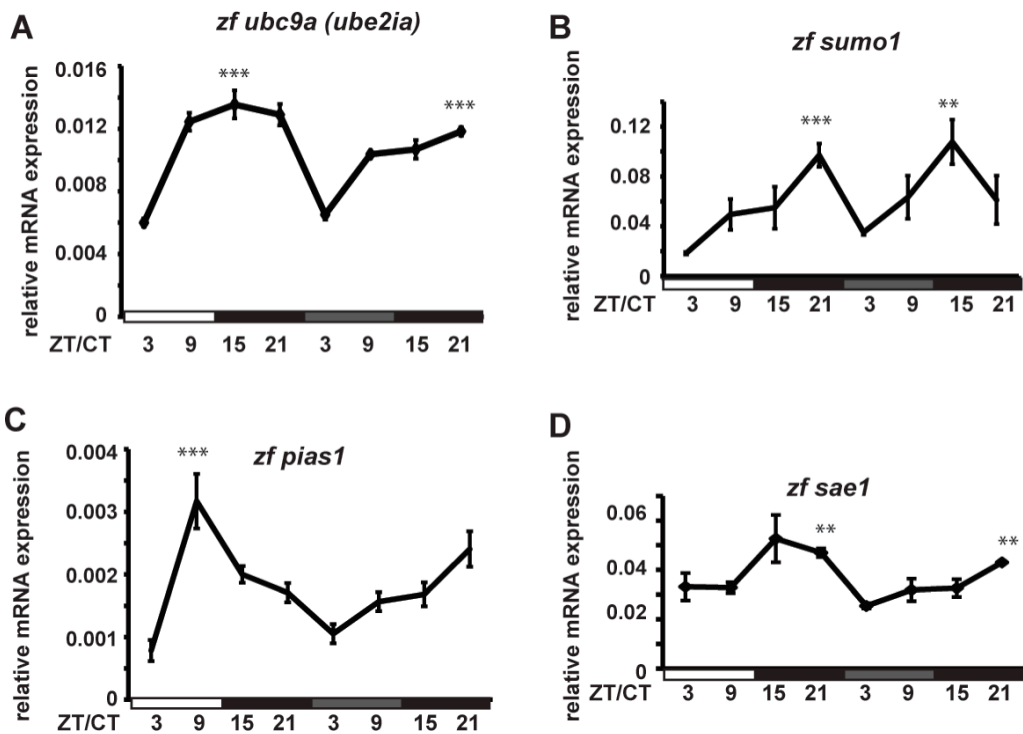

**Supplementary Figure S6: Real time qRT-PCR analysis of zebrafish genes involved in SUMOylation.** qRT-PCR analysis of *zf ubc9a* NM\_131833.2 (A), *zf sumo1* NM\_213159.1 (B), *zf pias1* XM\_687829.4 (C) and *zf sae1* NM\_001002058.1 (D) during exposure for 24 hours to LD cycle followed by 24 hours in DD. RNA samples were harvested at 6 hrs intervals and relative mRNA levels calculated and plotted on the y-axes. ZT and CT times are plotted on the x-axes. Relative expression of  $\beta$ -actin mRNA was used for normalization. Statistical significance between peak and trough points is indicated above the graph by asterisks (\*). Results of the CircWave analysis are represented in Supplementary Table S1.



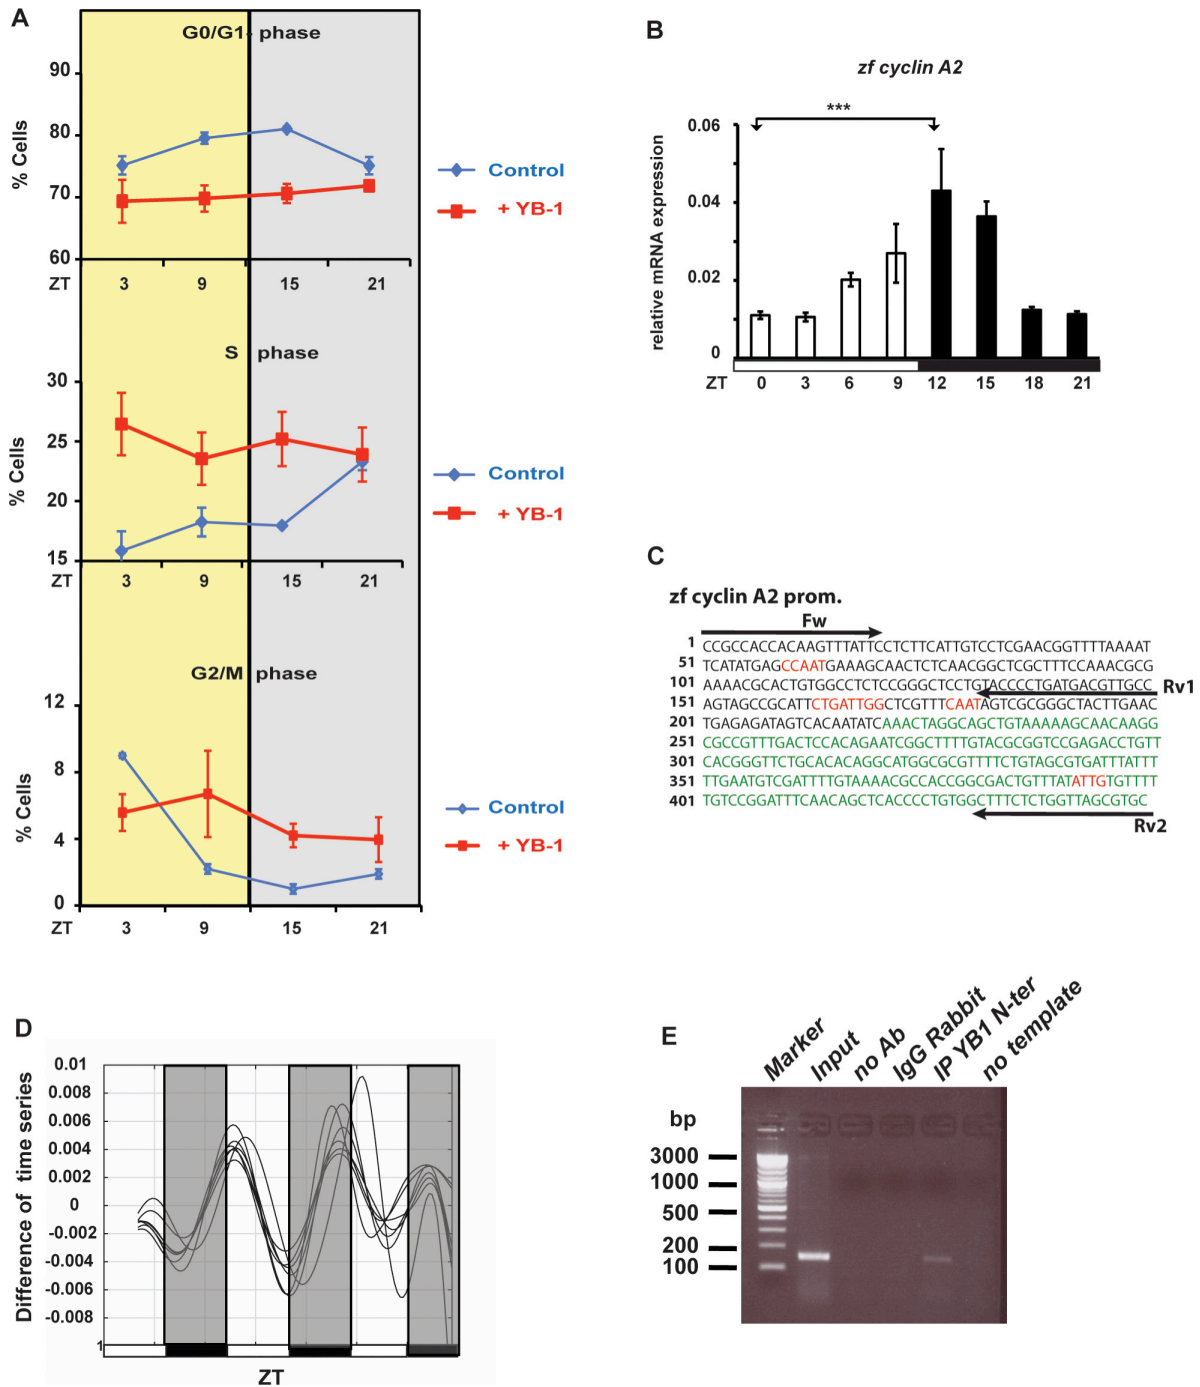

**Supplementary Figure S7: Regulation of *zfcyclin A2* expression by YB-1.** (A) DNA cell cycle profile of PAC2 cells in the absence (blue traces) or presence of a transfected YB-1 expressing construct (red traces) during a 24 hours LD cycle. DNA cell cycle distribution, G0/G1 (upper panel), S (central panel) and G2M (lower panel), was determined by PI staining and FACS flow cytometry. DNA histograms were analyzed by BD accuri C6 analysis software. Samples were harvested at 6 hrs intervals and the percentages of cells in the specific cell cycle phases are plotted on the y-axis. ZT times are plotted on the x-axis. (B) qRT-PCR analysis of *zfcyclin A2* expression during 24 hours under LD cycle conditions in PAC-2 cells. Samples were harvested at 3 hrs intervals and relative mRNA levels were plotted on the y-axis. ZT times are plotted on the x-axis.  $\beta$ -actin expression was used for normalization. Statistical significance is indicated above the graph by asterisks (\*). (C) Sequence of the *zfcyclin A2* promoter region cloned upstream of a luciferase reporter gene. In red are indicated the putative forward and reverse CCAAT binding sites for YB-1. Black arrows indicate the forward (Fw) and the two reverse primers (Rv1 and Rv2) used for the ChIP assay. The sequence in green indicates the 5' UTR region. (D) Graphical representation of the real time bioluminescence assay results from PAC-2 cells transfected with the *cyclin A2 pr*: luciferase reporter. The difference of filtered time series bioluminescence is plotted on the y-axis and the ZT times on the x-axis. Results are plotted as 8 independent replicates (see materials and methods for details of the calculations and Figure 6A for raw data). White and black bars indicate the corresponding lighting conditions. (E) Agarose gel showing the amplified products from ChIP assays. DNA fragments of 150 bp were amplified using the primers shown in Supplementary Table S2. Input and negative controls are indicated.
